# Supplementary material for: Long non-coding RNA UCA1 promotes breast tumor growth by suppression of p27 (Kip1)
Source: PubMed Central journal article supplement — Cell Death Dis. 2014 Jan 23;5(1):e1008–. doi: 10.1038/cddis.2013.541 (PMC4040676; doi:10.1038/cddis.2013.541), 2014-01-23
Supplement: cddis2013541x1.pdf [file cddis2013541x1.pdf]

## Table S1 Primers and siRNA and LNA oligo used in this study

UCA1-RT-5.1

TTTGCCAGCCTCAGCTTAAT

UCA1-RT-3.1

TTGTCCCCATTTTCCATCAT

UCA1-EcoR1-5.1

ATTCTAGAGCTAGCGAATTCTGACATTCTTCTGGACAATG

UCA1-BamH1-3.1

ATCCTTGCGGCCGCGGATCCTTTATCAGGCATATTAGCTTTAA

UCA1-mt-3.1A

TTGTGGCTTTTAGGAGTAAGATGAGAGATCAAGCTGGCTGTC

UCA1-mt-Not1-3.1

GCGGCCGCTGATCGGCTCTCGGCCTAATCTTGTGGCTTTTAGGAGTAAG

UCA1-pCDH-R1-5.1

TTCTAGAGCTAGCGAATTCTGACATTCTTCTGGACAATG

UCA1-pCDH-Not1-3.1

TCGCAGATCCTTGCGGCCGCTTTATCAGGCATATTAGCTTTAA

UCA1-T7-5.1

TAATACGACTCACTATAGGGTGACATTCTTCTGGACAATG

UCA1-T7-5.2

TAATACGACTCACTATAGGGTTAGGCCGAGAGCCGATCAG

UCA1-Not1-3.1

GCGGCCGCTTTATCAGGCATATTAGCTTTAA

UCA1-Not1-3.2

GCGGCCGCTGATCGGCTCTCGGCCTAA

UCA1-mt-3.1A

TTGTGGCTTTTAGGAGTAAGATGAGAGATCAAGCTGGCTGTC

UCA1-mt-Not1-3.1

GCGGCCGCTGATCGGCTCTCGGCCTAATCTTGTGGCTTTTAGGAGTAAG

p27-5UTR-Xba-luc-5.1

GATCGCCGTGTAATTCTAGACGCCATATTGGGCCACTAAA

p27-5UTR-renilla-5.1

AAGATGTCAAACGTGCGAGTATGGCTTCCAAGGTGTACGA

p27-5UTR-renilla-3.1

TCGTACACCTTGGAAGCCATACTCGCACGTTTGACATCTT

R-luci-F-luci-Xba-3.1

GGCCGGCCGCCCGACTCTAGAATTACTGCTCGTTCT

UCA1-siRNA

GGACAACAGUACACGCAUAdTdT

UCA1-LNA-1

/5Biosg/A+G+C+TGGCTGTCTG+A+TGGGCATGGC+T+T+T

Fig. S1

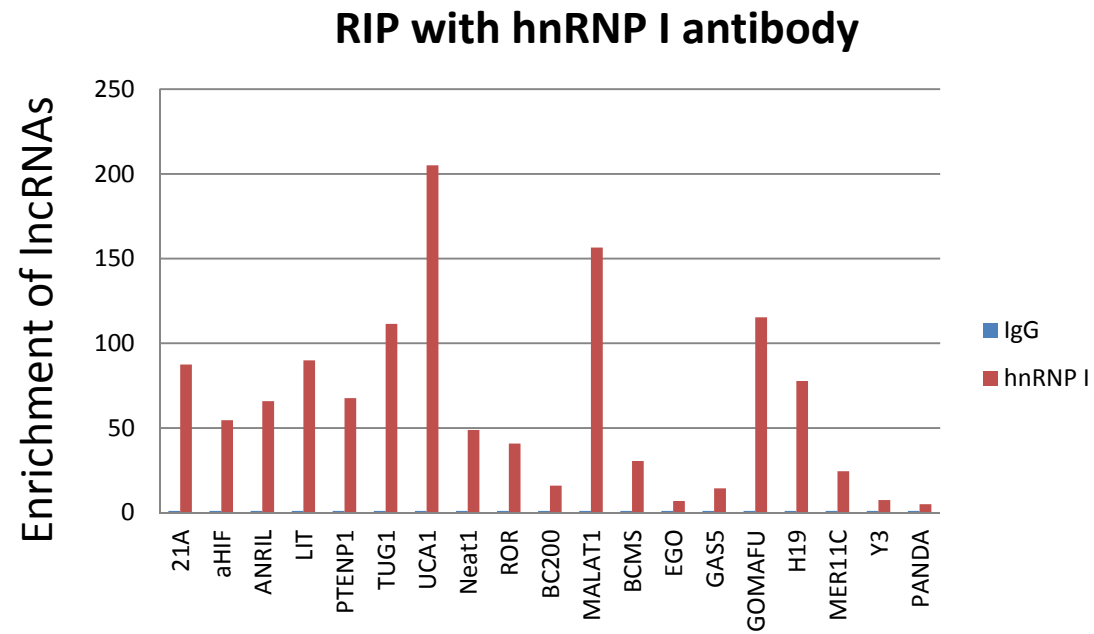

Fig.S1 Preliminary screen for lncRNA by RNA immunoprecipitation assays with hnRNP I antibody. Values are averages of two experiments.

Fig. S2

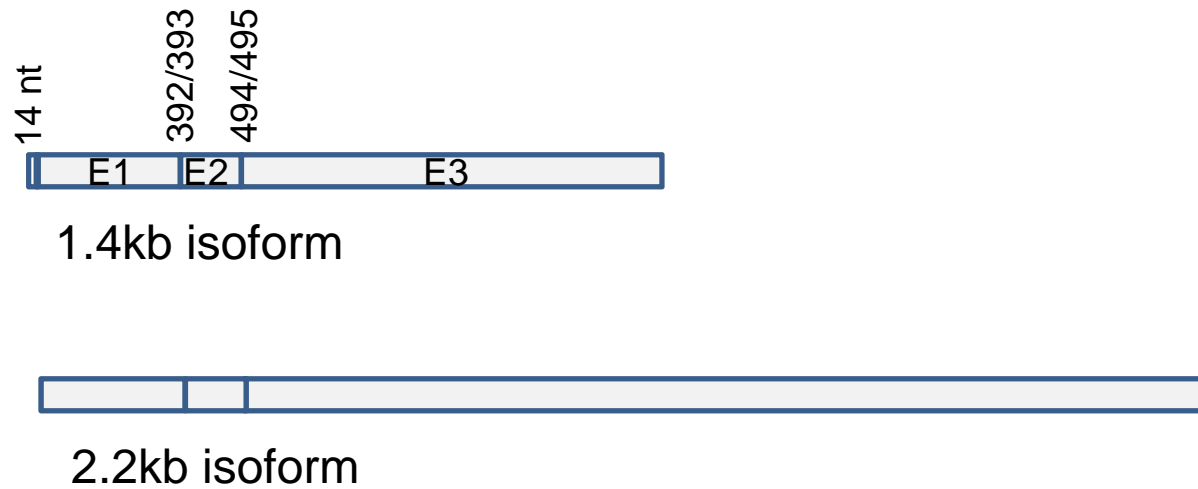

Fig. S2 Two isoforms of UCA1 based on literature reports. The 1.4 kb isoform is included in the 2.2 kb isoform.

Fig. S3

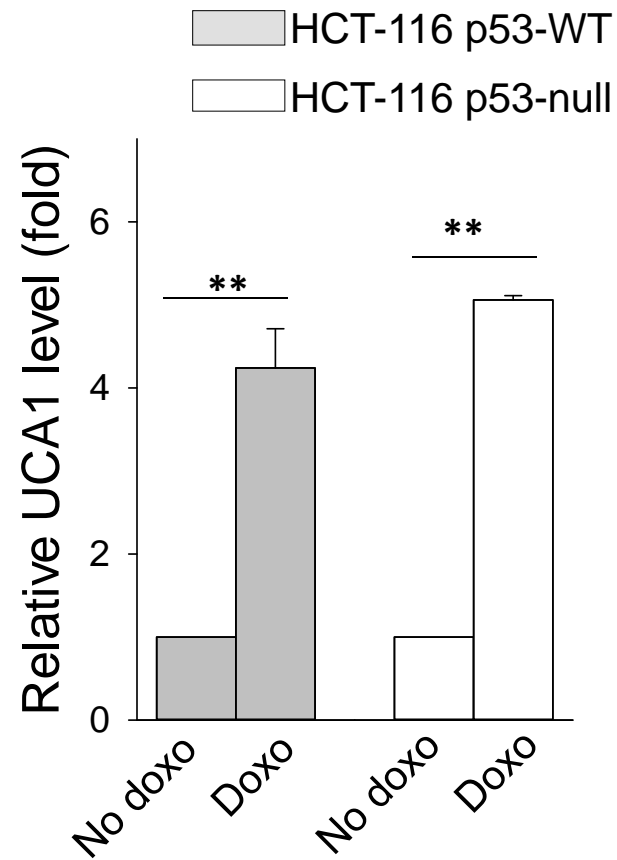

Fig. S3 Induction of UCA1 by doxo independent of p53. Cells were treated with doxo at 1  $\mu$ g/ml for 24 h before they were harvested for RNA extraction.

Fig. S4

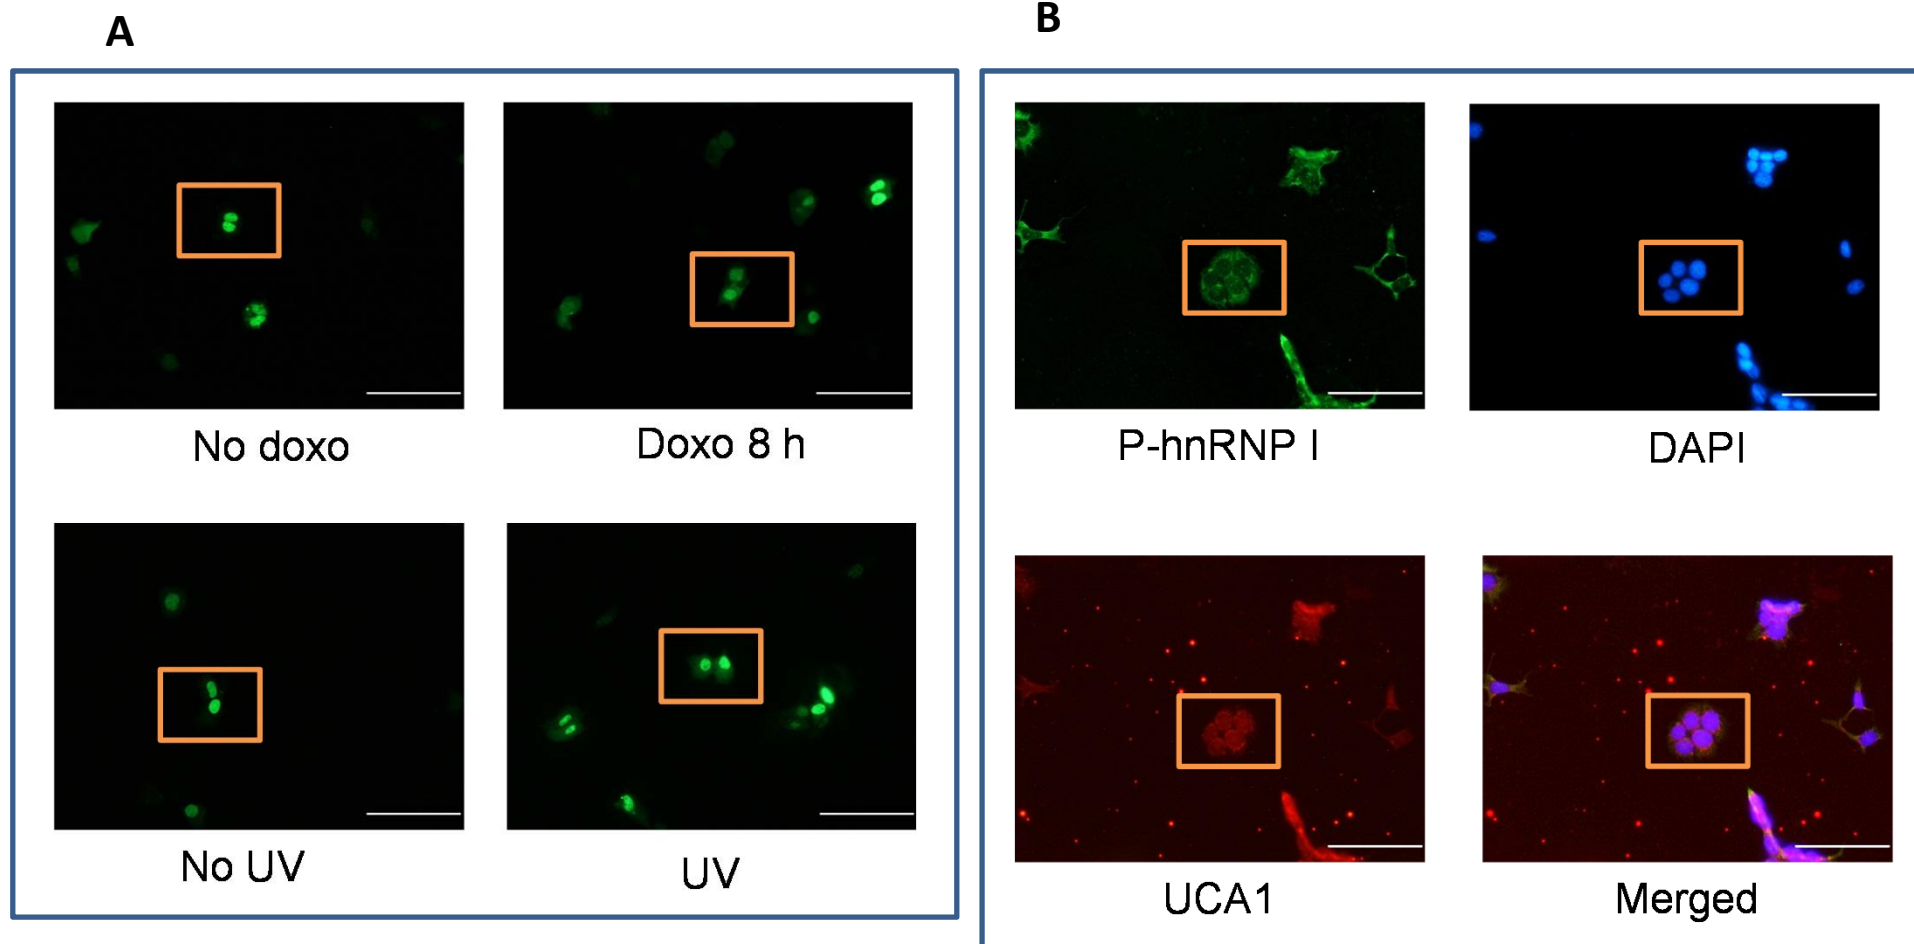

Fig. S4 Detection of the redistribution of hnRNP I-GFP after doxo or UV treatment (A); and p-hnRNP I and UCA1 by IF and FISH, respectively (B). Boxed areas were cropped out for Fig. 3D and 3E used in text, respectively. Scale bars represent 50  $\mu\text{m}$ .

Fig. S5

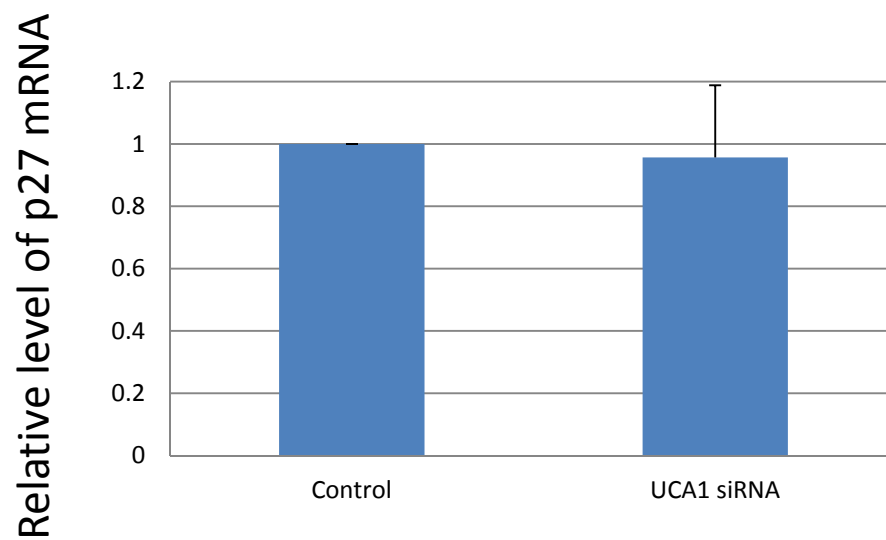

Fig. S5 UCA1 has no effect on p27 mRNA level as detected by RT-PCR

Fig. S6

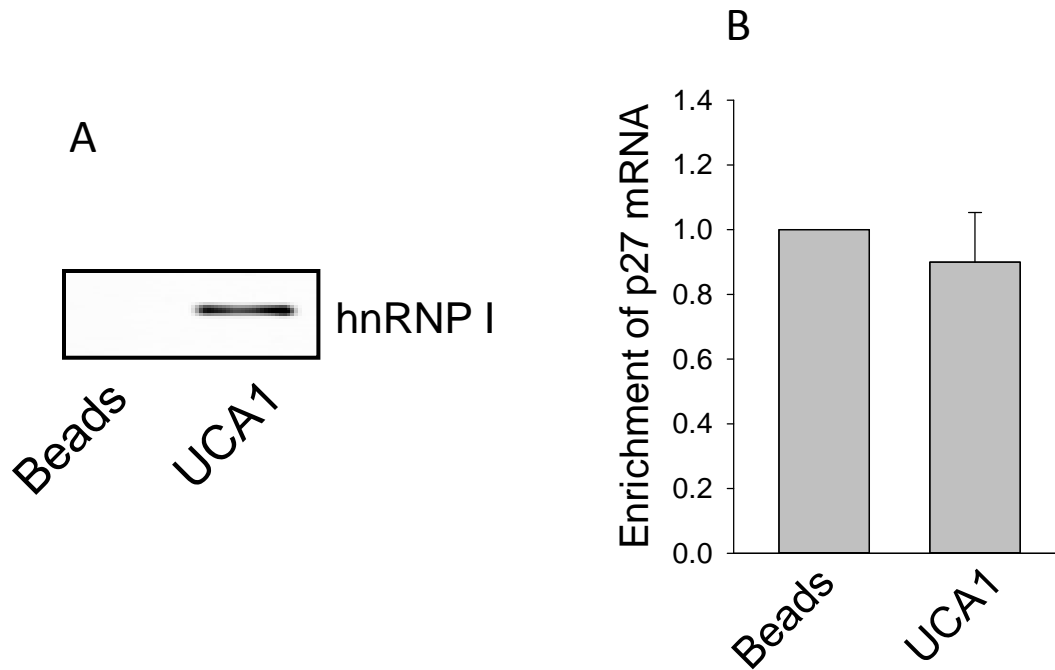

Fig. S6 UCA1 and p27 mRNA are not in the same hnRNP I complex. After RNA precipitation with UCA1 probe, the pellet was used for western to detect hnRNP I (A) or qRT-PCR to detect p27 mRNA (B).



Fig. S7

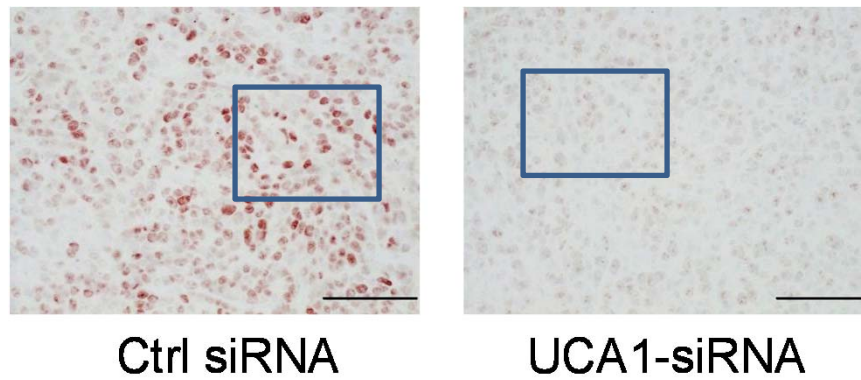

Fig. S7 Detection of Ki-67 in xenografted tumor samples by IHC. Boxed areas were cropped out for Fig. 5E used in text. Scale bars represent 50  $\mu\text{m}$ .

Fig. S8

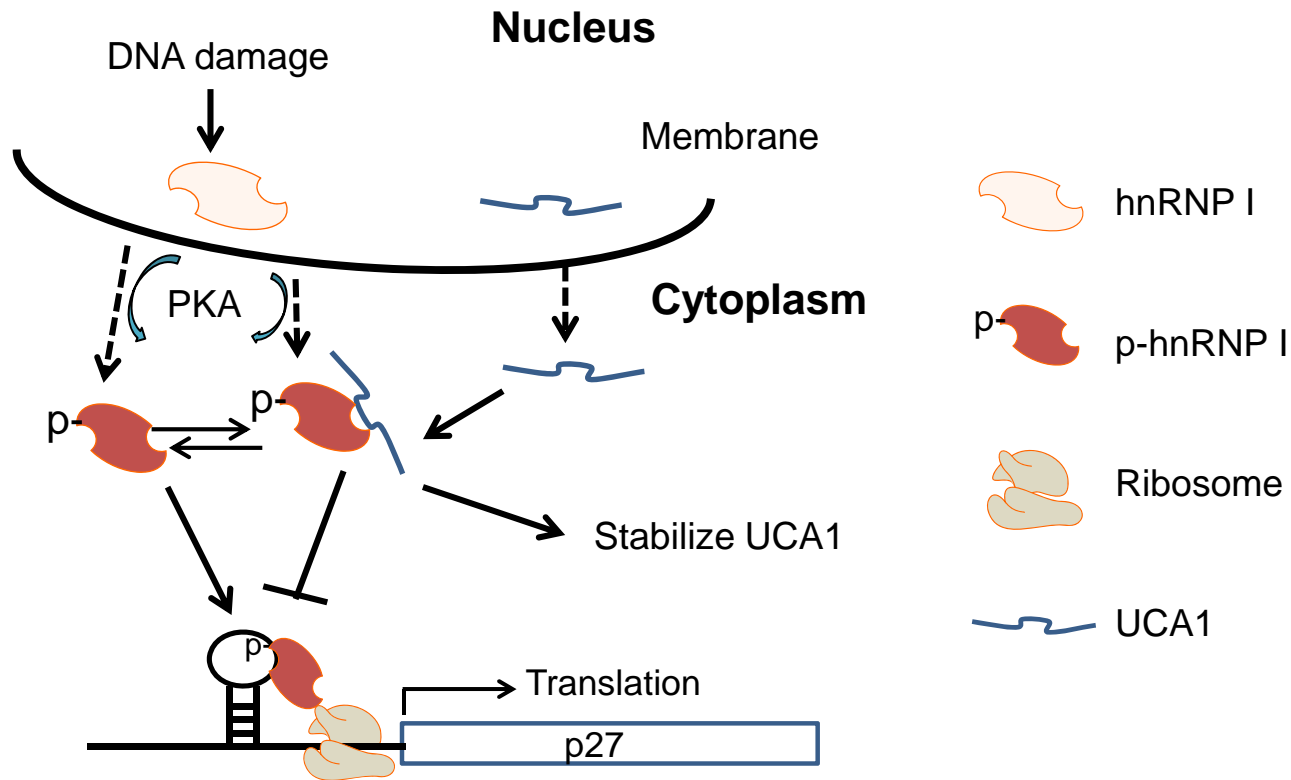

Fig. S8 A working model to explain how UCA1 suppresses p27 translation through hnRNP I.
